# Supplementary material for: Site-specific associations between miRNA expression and survival in colorectal cancer cases
Source: PubMed Central journal article supplement (PMC5312378; doi:10.18632/oncotarget.11173), 2016-08-10
Supplement: oncotarget-07-60193-s001.pdf [file oncotarget-07-60193-s001.pdf]

## Site-specific associations between miRNA expression and survival in colorectal cancer cases

### Supplementary Materials

**Supplementary Table S1: Colon differential expression by AJCC stage (adjusted for age, sex, and MSI)**

| Stage            | miRNA          | % expressing   | Q1    | Q3    | HR           | 95% (CI)     | p-value      | q-value |
|------------------|----------------|----------------|-------|-------|--------------|--------------|--------------|---------|
| 1&2              | hsa-miR-181d   | 98.0           | -0.06 | 0.54  | 0.89         | (0.74, 1.08) | 0.02         | 1.00    |
|                  | hsa-miR-30b-3p | 90.7           | -0.09 | 0.34  | 0.91         | (0.82, 1.00) | 0.02         | 1.00    |
|                  | hsa-miR-4284   | 100.0          | -0.41 | 0.51  | 0.69         | (0.54, 0.90) | 0.01         | 1.00    |
|                  | hsa-miR-429    | 65.9           | -0.22 | 1.69  | 0.80         | (0.64, 0.99) | 0.04         | 1.00    |
|                  | hsa-miR-4461   | 65.7           | -0.48 | 0.69  | 0.80         | (0.66, 0.97) | 0.01         | 1.00    |
|                  | hsa-miR-4485   | 100.0          | -0.80 | 0.08  | 0.66         | (0.47, 0.93) | 0.04         | 1.00    |
|                  | hsa-miR-758-5p | 99.7           | -0.48 | 0.15  | 0.75         | (0.60, 0.93) | 0.04         | 1.00    |
|                  | 3&4            | hsa-miR-15a-5p | 62.8  | -0.88 | 1.45         | 0.83         | (0.71, 0.97) | 0.02    |
| hsa-miR-181d     | 98.0           | -0.07          | 0.57  | 1.11  | (1.02, 1.20) | 0.03         | 1.00         |         |
| hsa-miR-192-5p   | 97.3           | -1.59          | -0.09 | 0.88  | (0.79, 0.97) | 0.01         | 0.97         |         |
| hsa-miR-194-3p   | 100.0          | -0.64          | 0.02  | 0.86  | (0.74, 0.99) | 0.05         | 1.00         |         |
| hsa-miR-1973     | 99.9           | -0.82          | 0.18  | 0.90  | (0.83, 0.99) | 0.03         | 1.00         |         |
| hsa-miR-30a-5p   | 31.0           | -1.60          | 0.00  | 1.15  | (1.02, 1.30) | 0.03         | 1.00         |         |
| hsa-miR-30b-3p   | 90.7           | -0.10          | 0.29  | 1.06  | (1.01, 1.11) | 0.01         | 1.00         |         |
| hsa-miR-3161     | 99.4           | -0.29          | 0.06  | 1.14  | (1.03, 1.25) | 0.01         | 0.97         |         |
| hsa-miR-3622b-5p | 100.0          | -0.21          | 0.14  | 0.87  | (0.78, 0.98) | 0.02         | 1.00         |         |
| hsa-miR-3651     | 99.3           | 0.53           | 1.59  | 0.91  | (0.82, 1.00) | 0.04         | 1.00         |         |
| hsa-miR-3676-3p  | 72.6           | -0.47          | 0.52  | 0.92  | (0.85, 0.99) | 0.03         | 1.00         |         |
| hsa-miR-4269     | 97.0           | -0.14          | 0.24  | 1.05  | (1.00, 1.10) | 0.04         | 1.00         |         |
| hsa-miR-4284     | 100.0          | -0.63          | 0.37  | 0.84  | (0.75, 0.95) | 0.00         | 0.97         |         |
| hsa-miR-4485     | 100.0          | -0.89          | 0.03  | 0.83  | (0.71, 0.96) | 0.01         | 1.00         |         |
| hsa-miR-492      | 95.4           | -0.78          | 0.12  | 1.16  | (1.05, 1.28) | 0.00         | 0.97         |         |
| hsa-miR-662      | 99.9           | -0.34          | 0.01  | 0.91  | (0.83, 0.99) | 0.05         | 1.00         |         |
| hsa-miR-99b-5p   | 47.3           | -0.45          | 1.54  | 1.23  | (1.08, 1.40) | 0.00         | 0.97         |         |

**Supplementary Table S2: Rectal differential expression by AJCC stage (adjusted for age, sex, and MSI). See Supplementary\_Table\_S2**

**Supplementary Table S3: Hazard ratio (HR) associated with miRNA expression for colon cancer adjusted for age, sex, and MSI status**

| Study            | % expressing | 25th%ile | 75th%ile | HR   | 95% (CI)     | <i>p</i> -value | <i>q</i> -value |
|------------------|--------------|----------|----------|------|--------------|-----------------|-----------------|
| hsa-miR-15a-5p   | 62.9         | -0.51    | 1.45     | 0.87 | (0.77, 0.97) | 0.0153          | 0.96            |
| hsa-miR-181a-5p  | 99.8         | -0.12    | 0.75     | 1.15 | (1.01, 1.31) | 0.0396          | 1.00            |
| hsa-miR-192-5p   | 99.4         | -1.46    | -0.02    | 0.87 | (0.80, 0.95) | 0.0031          | 0.51            |
| hsa-miR-193b-3p  | 83.2         | -0.19    | 1.65     | 1.13 | (1.00, 1.27) | 0.0395          | 1.00            |
| hsa-miR-194-3p   | 99.9         | -0.60    | 0.03     | 0.85 | (0.75, 0.97) | 0.0322          | 1.00            |
| hsa-miR-194-5p   | 99.6         | -1.28    | 0.09     | 0.90 | (0.82, 0.99) | 0.0404          | 1.00            |
| hsa-miR-196b-5p  | 71.0         | -0.57    | 2.27     | 0.85 | (0.74, 0.98) | 0.0417          | 1.00            |
| hsa-miR-1973     | 100.0        | -0.74    | 0.21     | 0.90 | (0.83, 0.97) | 0.0104          | 0.91            |
| hsa-miR-30a-5p   | 59.4         | -1.64    | 0.00     | 1.13 | (1.01, 1.27) | 0.0274          | 1.00            |
| hsa-miR-3161     | 99.8         | -0.28    | 0.06     | 1.11 | (1.02, 1.21) | 0.0107          | 0.91            |
| hsa-miR-3622b-5p | 100.0        | -0.22    | 0.15     | 0.87 | (0.78, 0.97) | 0.0166          | 0.96            |
| hsa-miR-3651     | 99.1         | 0.51     | 1.62     | 0.90 | (0.82, 0.98) | 0.0230          | 1.00            |
| hsa-miR-3676-3p  | 76.4         | -0.46    | 0.47     | 0.93 | (0.87, 0.99) | 0.0229          | 1.00            |
| hsa-miR-4284     | 100.0        | -0.52    | 0.49     | 0.82 | (0.74, 0.91) | 0.0004          | 0.28            |
| hsa-miR-4485     | 100.0        | -0.83    | 0.06     | 0.81 | (0.71, 0.92) | 0.0019          | 0.46            |
| hsa-miR-492      | 98.4         | -0.81    | 0.13     | 1.14 | (1.04, 1.25) | 0.0037          | 0.51            |
| hsa-miR-497-5p   | 71.6         | -2.35    | 0.00     | 1.18 | (1.00, 1.39) | 0.0494          | 1.00            |
| hsa-miR-662      | 99.9         | -0.36    | 0.01     | 0.91 | (0.83, 0.99) | 0.0350          | 1.00            |
| hsa-miR-99b-5p   | 53.2         | -0.46    | 1.15     | 1.16 | (1.06, 1.28) | 0.0020          | 0.46            |

**Supplementary Table S4: Differential miRNA expression between carcinoma and normal mucosa associated with survival in rectal cancer cases where FDR *q* value is  $\geq 0.031$ . See Supplementary Table\_S4**
